# Supplementary material
Source: PubMed Central journal article supplement (PMC6366122)
Supplement: la8b01832_si_001.pdf [file la8b01832_si_001.pdf]

## **Supporting Information**

# **Systematic Comparison of Zwitterionic and Non-Zwitterionic Antifouling Polymer Brushes on a Bead-Based Platform**

*Esther van Andel,<sup>a,b</sup> Stefanie C. Lange,<sup>a</sup> Sidharam P. Pujari,<sup>a</sup> Edwin J. Tijhaar,<sup>b</sup> Maarten M. J. Smulders,<sup>a</sup> Huub F. J. Savelkoul,<sup>b</sup> Han Zuilhof,<sup>a,c,d,\*</sup>*

<sup>a</sup> Laboratory of Organic Chemistry, Wageningen University, Stippeneng 4, 6708 WE Wageningen, The Netherlands. <sup>b</sup> Cell Biology and Immunology group, Wageningen University, De Elst 1, 6709 PG Wageningen, The Netherlands. <sup>c</sup> School of Pharmaceutical Sciences and Technology, Tianjin University, 92 Weijin Road, Tianjin 300072, People's Republic of China. <sup>d</sup> Department of Chemical and Materials Engineering, King Abdulaziz University, Jeddah, Saudi Arabia

E-mail: [Han.Zuilhof@wur.nl](mailto:Han.Zuilhof@wur.nl)

TABLE OF CONTENTS

|                                |     |
|--------------------------------|-----|
| Monomer characterization       | S3  |
| Additional XPS Spectra         | S11 |
| Zeta potential measurements    | S23 |
| Additional flow cytometry data | S24 |
| SPR experiments                | S26 |
| References                     | S26 |

## CHARACTERIZATION SYNTHESIZED MONOMERS

### 3-((3-methacrylamidopropyl)dimethylammonio)ethane-1-sulfonate (SBMAA-2)

**Yield:** 4.5 g (16 mmol, 56%), [C<sub>11</sub>H<sub>22</sub>N<sub>2</sub>O<sub>4</sub>S, M = 278.37 g/mol]

**<sup>1</sup>H NMR** (400 MHz, D<sub>2</sub>O) δ 5.62 (s, 1H, 3a), 5.37 (s, 1H, 3b), 3.65 – 3.55 (m, 2H, 11-H), 3.34 – 3.23 (m, 6H, 6,8,12-H), 3.05 (s, 6H, 9,10-H), 1.97 (dt, J = 14.9, 6.7 Hz, 2H, 7-H), 1.83 (s, 3H, 1-H) ppm.

**<sup>13</sup>C NMR** (101 MHz, D<sub>2</sub>O) δ 171.99 (C-4), 138.82 (C-2), 121.36 (C-3), 62.20 (C-8), 59.17 (C-11), 50.93 (C-9,10), 44.05 (C-6), 36.13 (C-12), 22.28 (C-7), 17.60 (C-1) ppm.

**ESI<sup>+</sup>** (MeOH): calc.: m/z = 301.1198 [M+Na]<sup>+</sup>; det.: m/z = 301.1187 [M+Na]<sup>+</sup>.

**IR** (ATR): ν = 3382 (w, N–H stretching), 3041 (w, asymmetric CH<sub>2</sub> stretching), 2947 (w, asymmetric CH<sub>2</sub> stretching), 1656 (m, C=O bending), 1614 (m, alkene stretching), 1524 (m, N–H bending), 1202 (s, SO<sub>2</sub> symmetric stretching), 1038 (s, SO<sub>3</sub> stretching) cm<sup>-1</sup>.

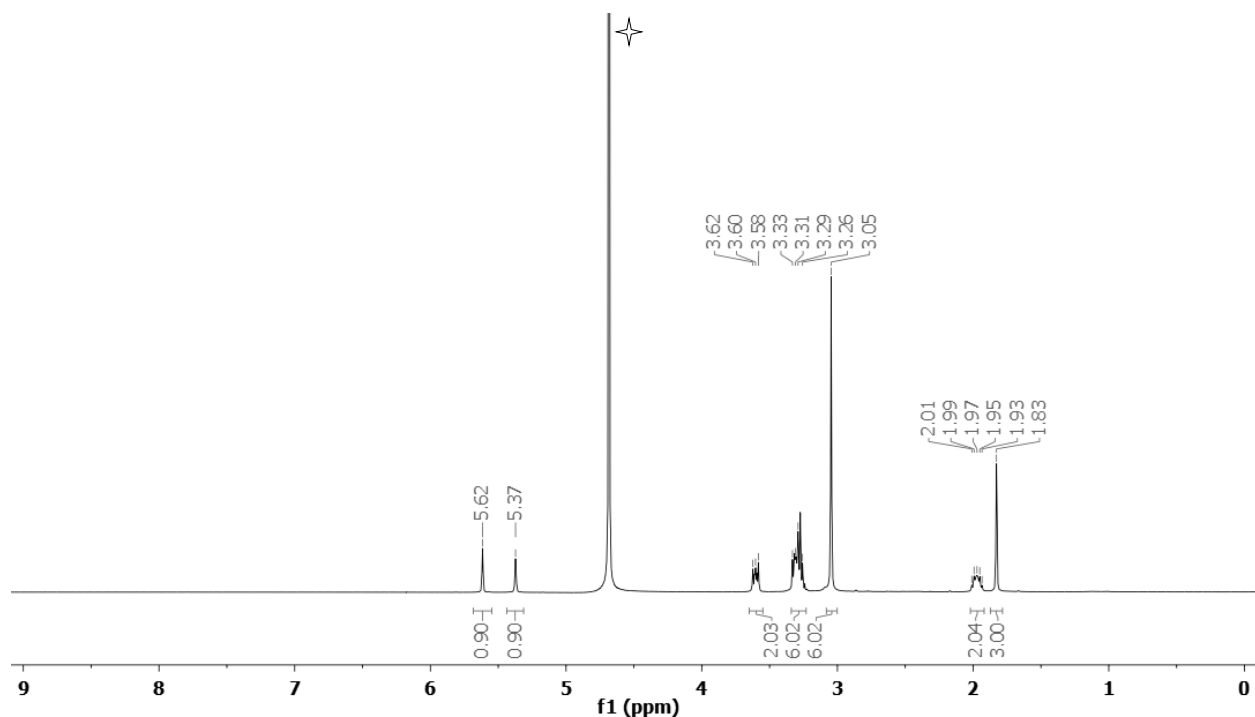

**Figure S1.** <sup>1</sup>H-NMR spectrum of **SBMAA-2** in D<sub>2</sub>O at 300 K, 400 MHz. ☆ residual H<sub>2</sub>O.

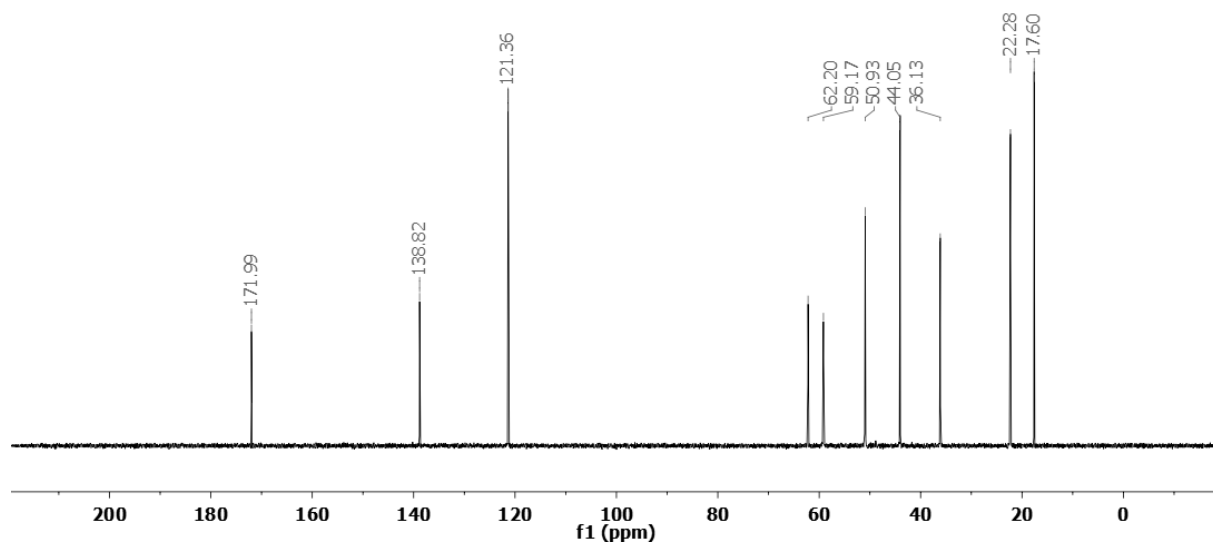

**Figure S2.**  $^{13}\text{C}$ -NMR spectrum of SBMAA-2 in  $\text{D}_2\text{O}$  at 300 K, 101 MHz.

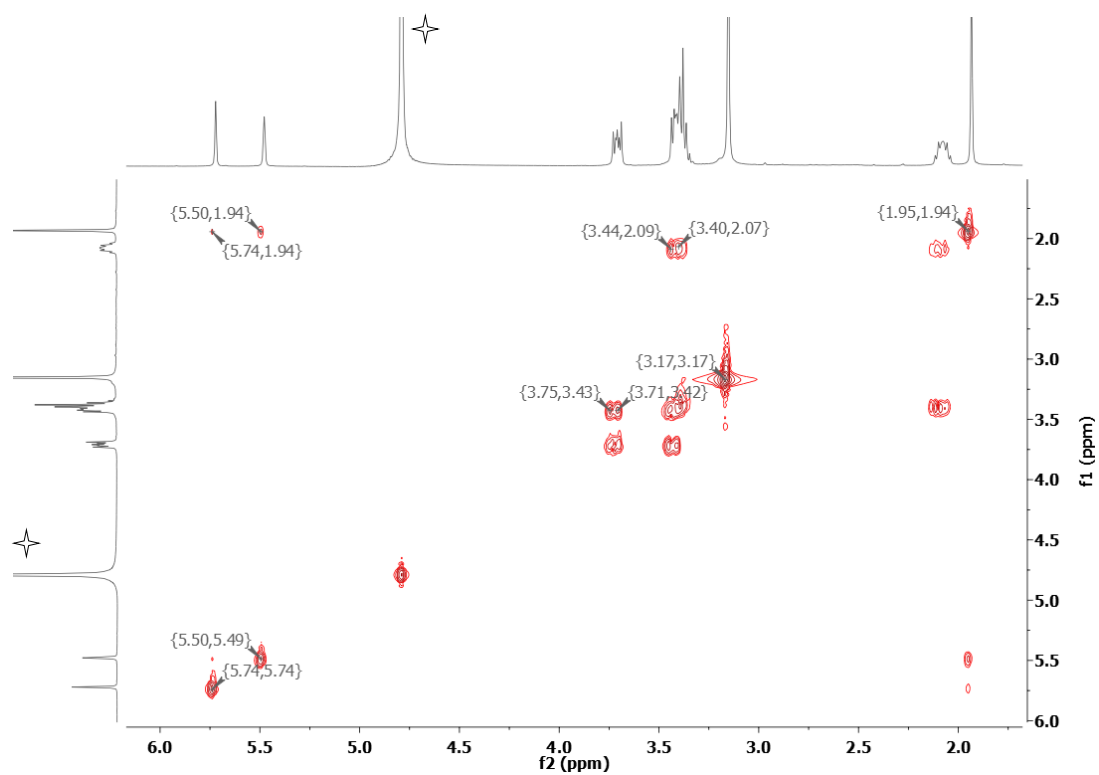

**Figure S3.** GCOSY-NMR spectrum of SBMAA-2 in  $\text{D}_2\text{O}$  at 300 K, 400 MHz.  $\star$  residual  $\text{H}_2\text{O}$ .

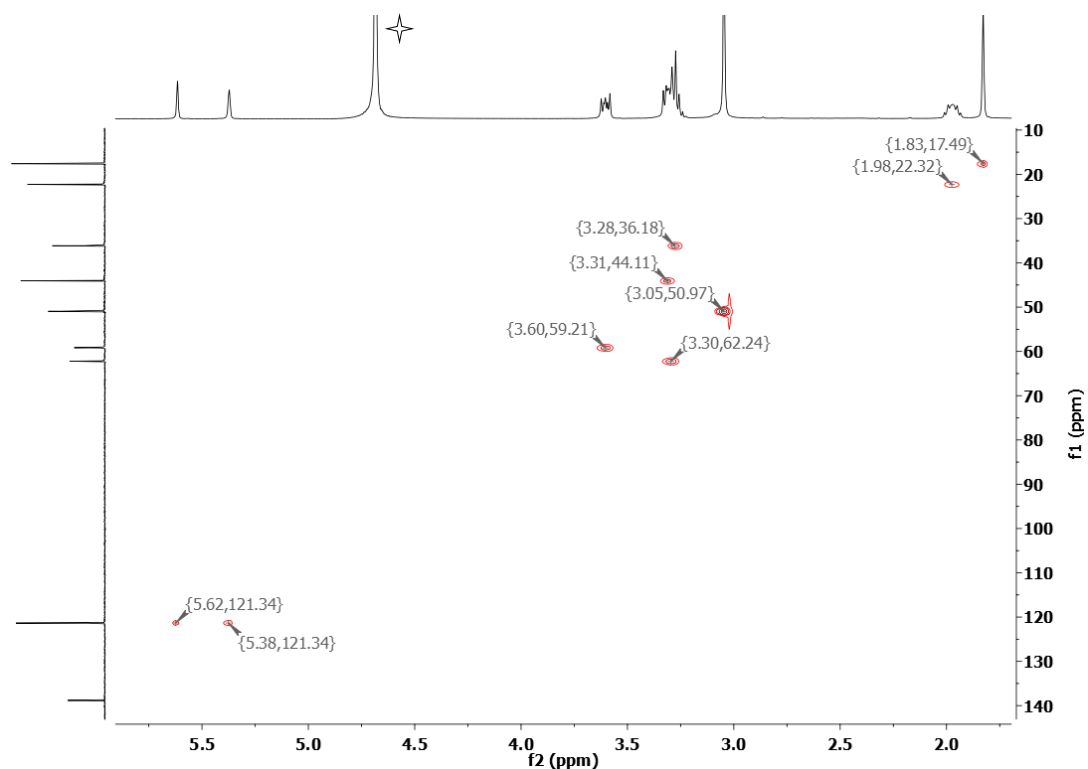

**Figure S4.** GHSQC-NMR spectrum of **SBMAA-2** in D<sub>2</sub>O at 300 K, 400 MHz for <sup>1</sup>H-NMR and 101 MHz for <sup>13</sup>C-NMR. ✧ residual H<sub>2</sub>O.

### 3-((3-methacrylamidopropyl)dimethylammonio)propane-1-sulfonate (**SBMAA-3**)<sup>1</sup>

**Yield:** 15.1 g (51.7 mmol, 94%), [C<sub>12</sub>H<sub>24</sub>N<sub>2</sub>O<sub>4</sub>S, M = 292.39 g/mol]

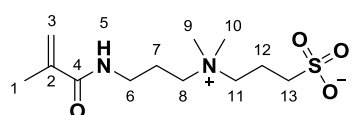

**<sup>1</sup>H NMR** (400 MHz, D<sub>2</sub>O) δ 5.68 (s, 1H, 3a-H), 5.44 (s, 1H, 3b-H), 3.49 – 3.40 (m, 2H, 11-H), 3.38 – 3.29 (m, 4H, 6,8-H), 3.08 (s, 6H, 9,10-H), 2.94 (t, J = 7.2 Hz, 2H, 13-H), 2.24 – 2.11 (m, 2H, 12-H), 2.07–1.96 (m, 2H, 7-H), 1.90 (s, 3H, 1-H) ppm.

**<sup>13</sup>C NMR** (101 MHz, D<sub>2</sub>O) δ 171.95 (C-4), 138.76 (C-2), 121.33 (C-3), 62.12 (C-11), 61.81 (C-8), 50.68 (C-9,10), 47.14 (C-13), 36.15 (C-6), 22.21 (C-7), 18.08 (C-12), 17.57 (C-1) ppm.

**ESI<sup>+</sup>** (MeOH): calc.:  $m/z = 293.1530 [M+H]^+$ ,  $315.1349 [M+Na]^+$ ,  $585.2986 [2M+H]^+$ ,  $607.2806 [2M+Na]^+$ ; det.:  $m/z = 293.1515 [M+H]^+$ ,  $315.1332 [M+Na]^+$ ,  $585.2956 [2M+H]^+$ ,  $607.2774 [2M+Na]^+$ .

**IR** (ATR):  $\nu = 3305$  (w, N–H stretching),  $3031$  (w, asymmetric CH<sub>2</sub> stretching),  $2977$  (w, symmetric CH<sub>2</sub> stretching),  $1656$  (m, C=O bending),  $1614$  (m, alkene stretching),  $1546$  (m, N–H bending),  $1191$ - $1174$  (s, SO<sub>2</sub> symmetric stretching),  $1038$  (s, SO<sub>3</sub> stretching) cm<sup>-1</sup>.

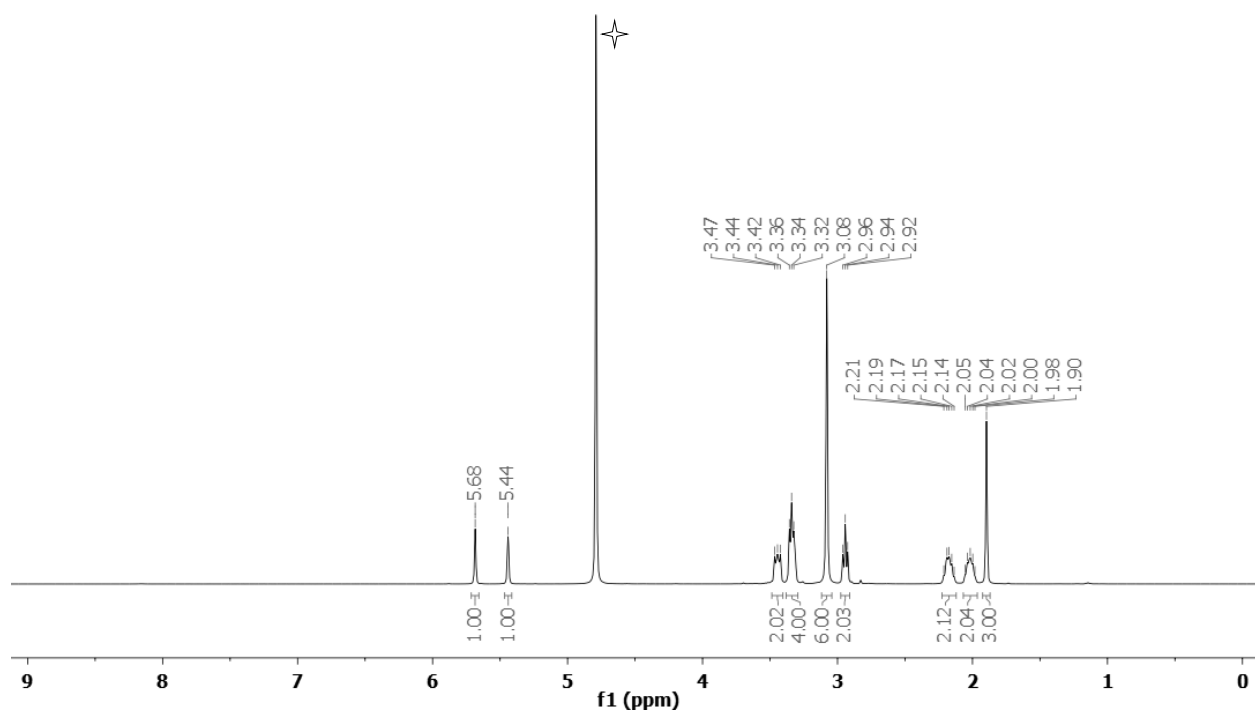

**Figure S5.** <sup>1</sup>H-NMR spectrum of **SBMAA-3** in D<sub>2</sub>O at 300 K, 400 MHz. ✧ residual H<sub>2</sub>O.

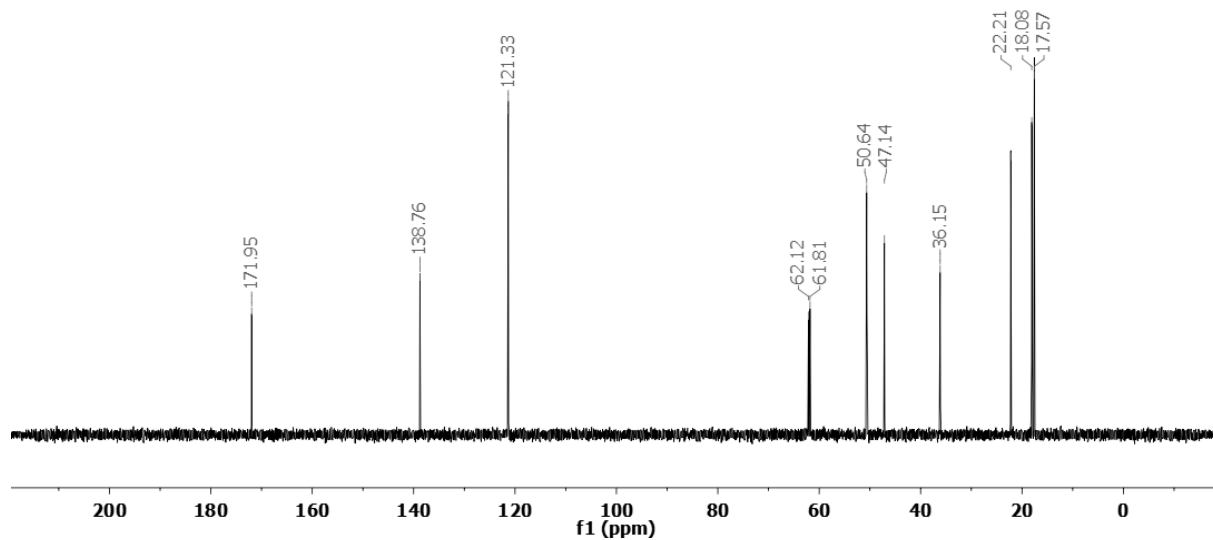

**Figure S6.**  $^{13}\text{C}$ -NMR spectrum of SBMAA-3 in  $\text{D}_2\text{O}$  at 300 K, 101 MHz.

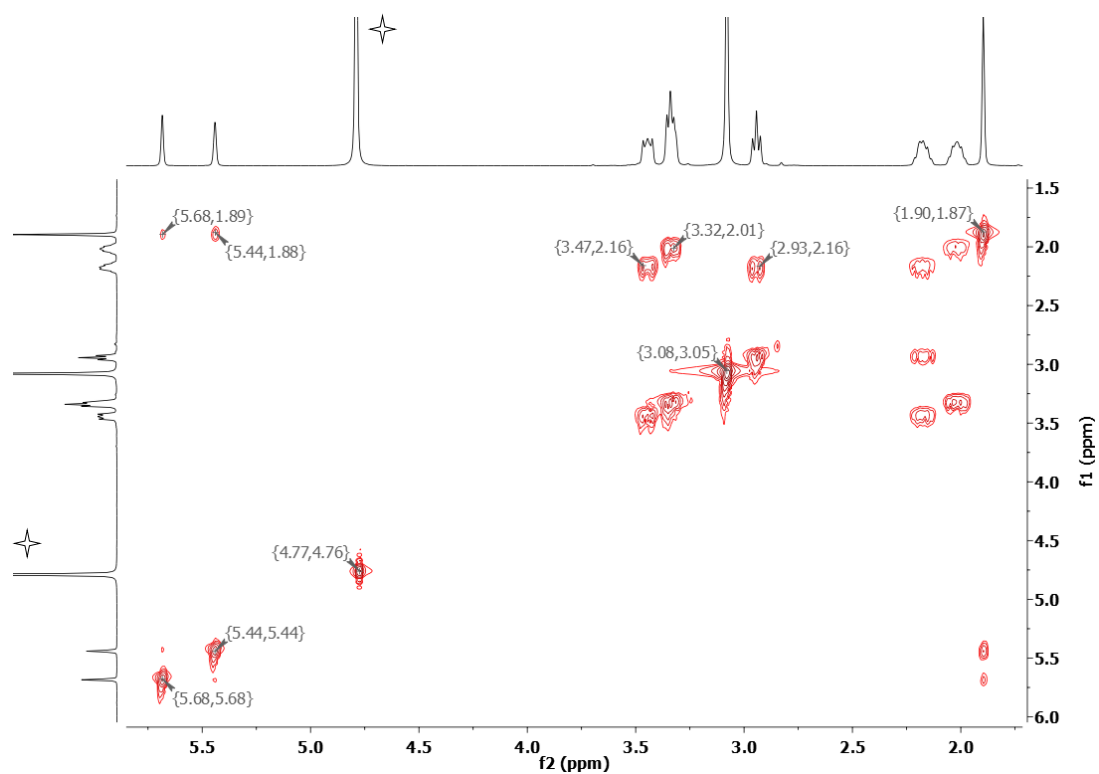

**Figure S7.** GCOSY-NMR spectrum of SBMAA-3 in  $\text{D}_2\text{O}$  at 300 K, 400 MHz.  $\star$  residual  $\text{H}_2\text{O}$ .

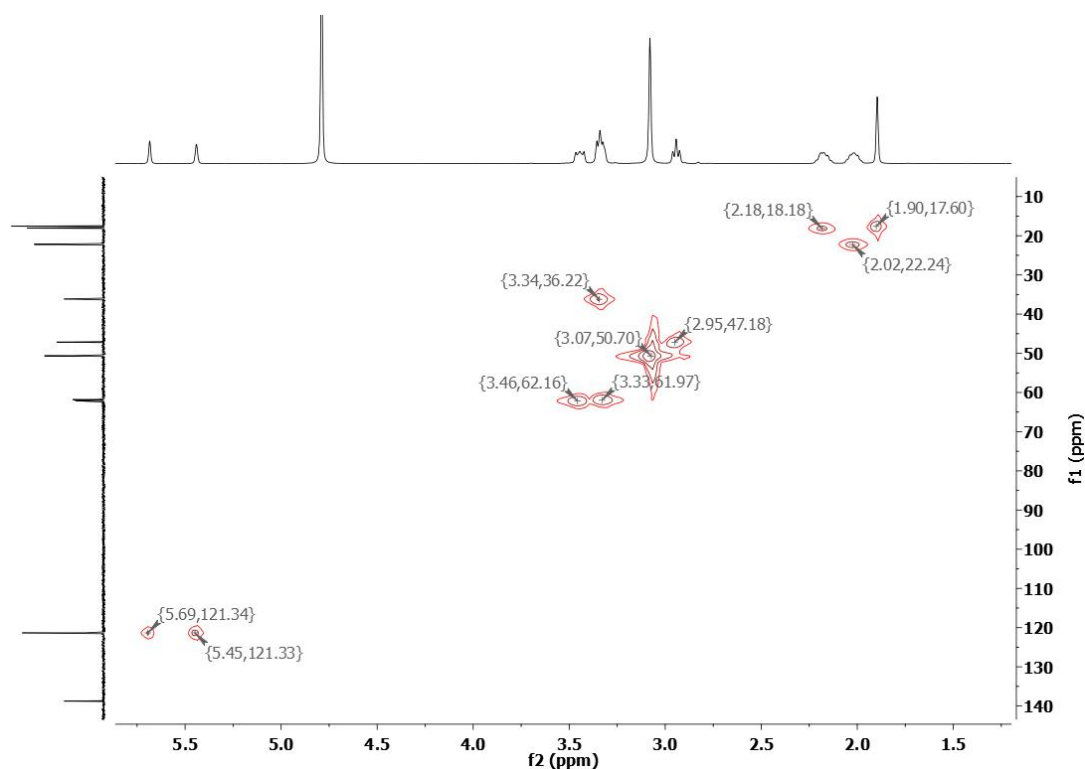

**Figure S8.** GHSQC-NMR spectrum of **SBMAA-3** in D<sub>2</sub>O at 300 K, 400 MHz for <sup>1</sup>H-NMR and 101 MHz for <sup>13</sup>C-NMR. ✧ residual H<sub>2</sub>O.

### 3-((3-methacrylamidopropyl)dimethylammonio)propanoate (CBMAA-2)

**Yield:** 30.0 g (124 mmol, 45%), [C<sub>12</sub>H<sub>22</sub>N<sub>2</sub>O<sub>3</sub>, M = 242.32 g/mol]

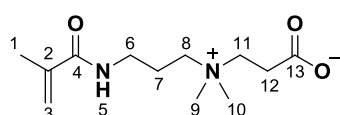

**<sup>1</sup>H NMR** (400 MHz, D<sub>2</sub>O) δ 5.63 (s, 1H, 3a-H), 5.39 (s, 1H, 3b-H), 3.48 (t, J = 7.8 Hz, 2H, 6-H), 3.32 – 3.20 (m, 4H, 8,11-H), 2.99 (s, 6H, 9,10-H), 2.62 – 2.52 (m, 2H, 12-H), 2.03 – 1.90 (m, 2H, 7-H), 1.84 (d, J = 1.2 Hz, 3H, 1-H) ppm.

**<sup>13</sup>C NMR** (101 MHz, D<sub>2</sub>O) δ 176.53 (C-13), 172.03 (C-4), 138.81 (C-2), 121.29 (C-3), 61.93 (C-11), 61.19 (C-8), 50.55-50.46 (C-9,10), 36.19 (C-6), 30.71 (C-12), 22.22 (C-7), 17.56 (C-1) ppm.

**ESI<sup>+</sup>** (MeOH): calc.: m/z = 243.1703 [M+H]<sup>+</sup>, 265.1523 [M+Na]<sup>+</sup>; det: m/z = 243.1698 [M+H]<sup>+</sup>, 265.1517 [M+Na]<sup>+</sup>.



**IR (ATR):**  $\nu = 3284$  (m, carboxylate),  $3037$  (w, asymmetric  $\text{CH}_2$  stretching),  $2957$  (w, symmetric  $\text{CH}_2$  stretching),  $1734$  (w, carboxylic acid  $\text{C}=\text{O}$  bending),  $1658$  (m, amide  $\text{C}=\text{O}$  bending),  $1591$  (s, alkene stretching),  $1540$  (s,  $\text{N}-\text{H}$  bending)  $\text{cm}^{-1}$ .

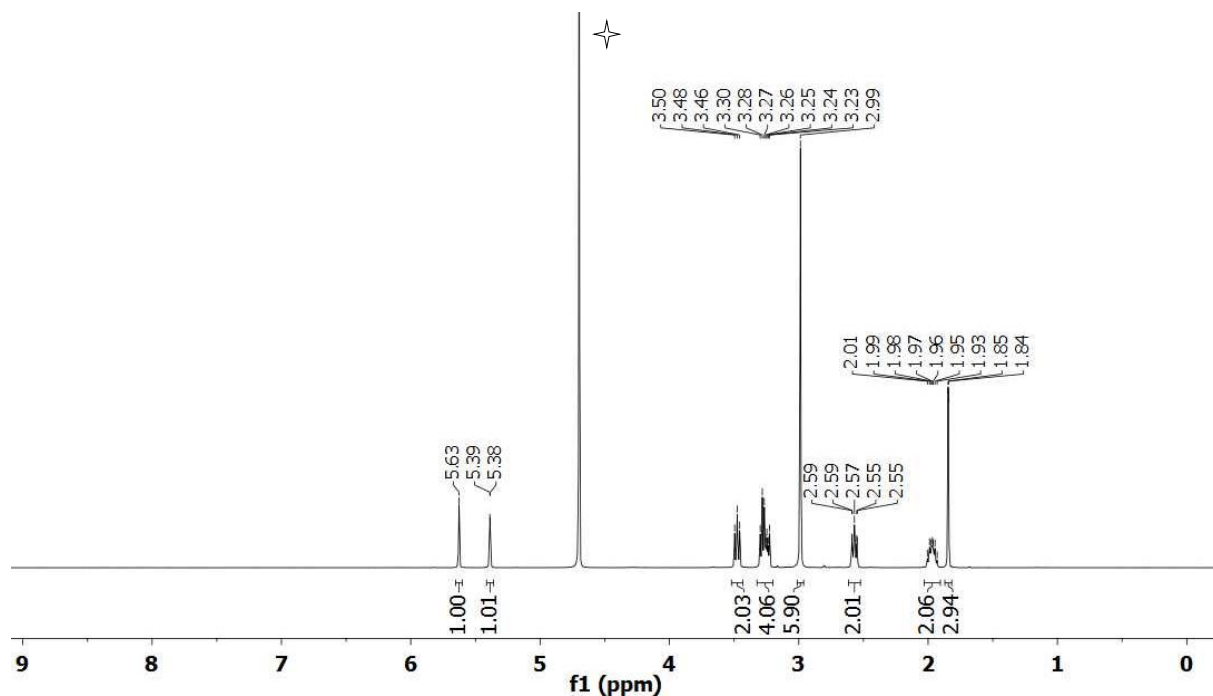

**Figure S9.**  $^1\text{H}$ -NMR spectrum of **CBMAA-2** in  $\text{D}_2\text{O}$  at 300 K, 400 MHz.  $\star$  residual  $\text{H}_2\text{O}$ .

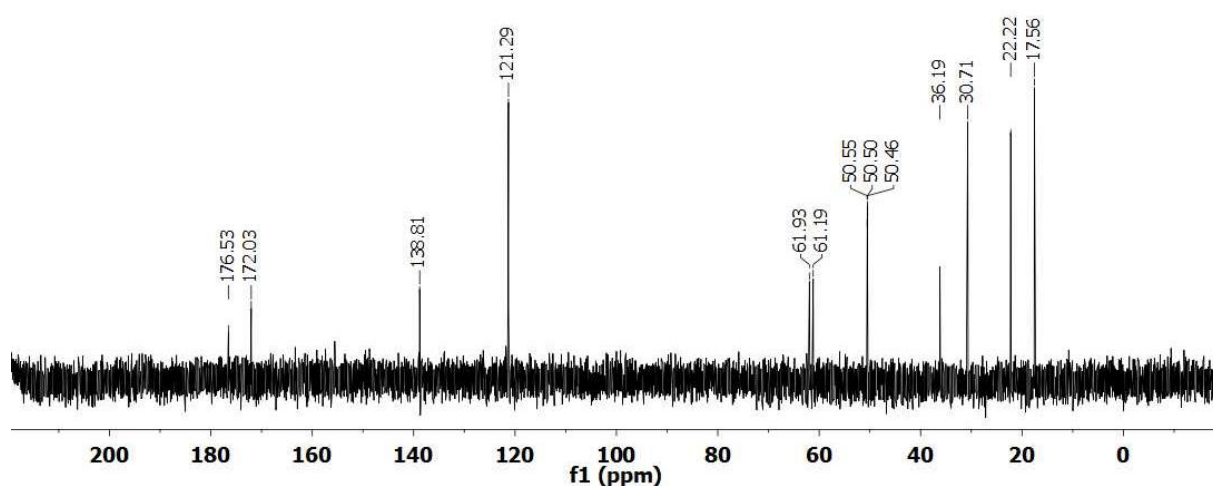

**Figure S10:**  $^{13}\text{C}$ -NMR spectra of **CBMAA-2** in  $\text{D}_2\text{O}$  at 300 K, 101 MHz.

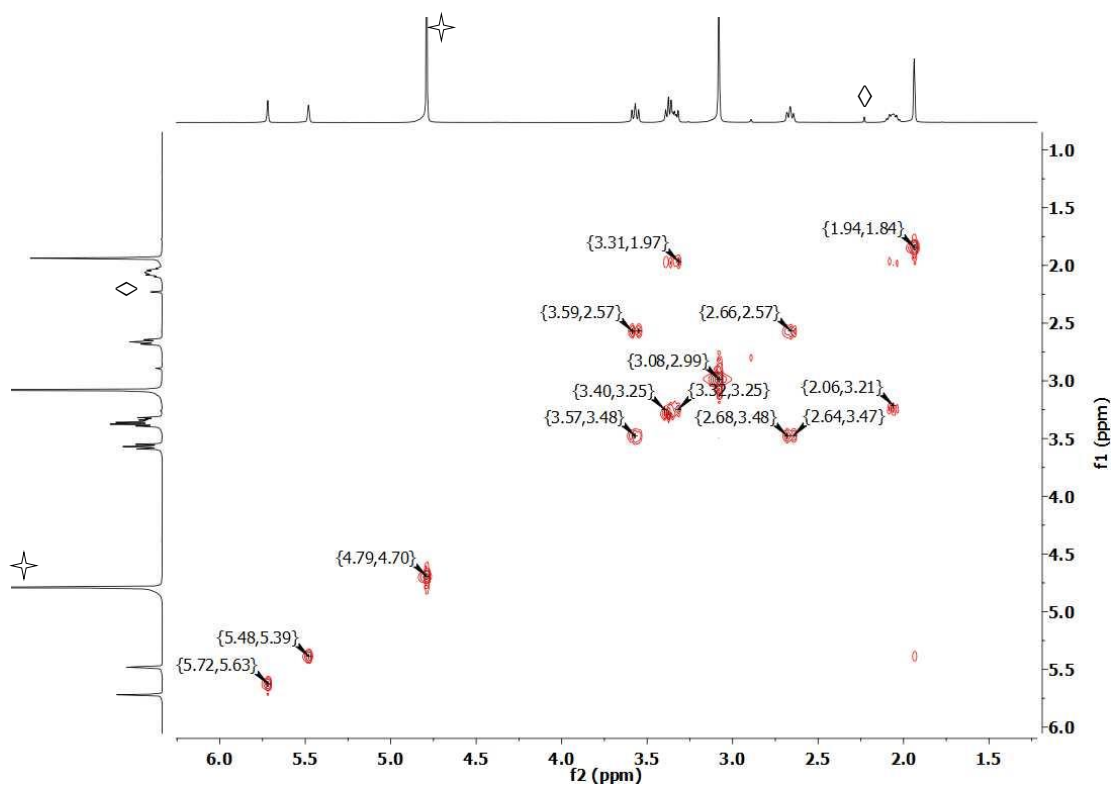

**Figure S11.** GCOSY-NMR spectrum of **CBMAA-2** in D<sub>2</sub>O at 300 K, 400 MHz. ✧ residual H<sub>2</sub>O, ◇ residual acetone.

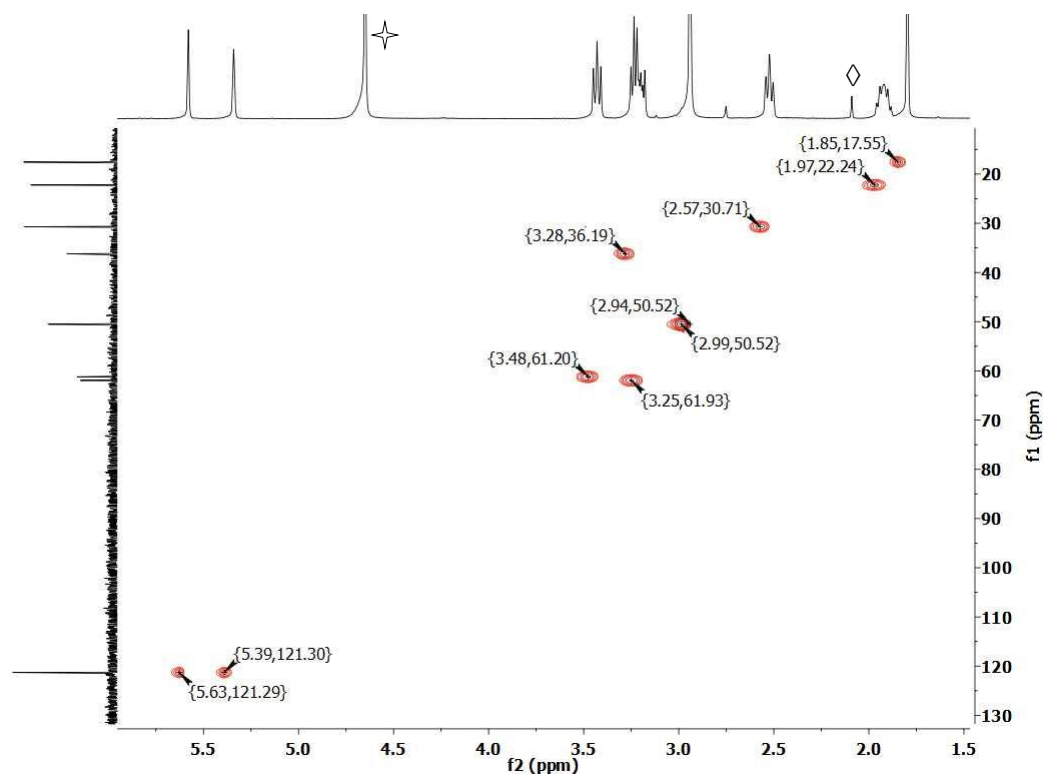

**Figure S12.** GHSQC-NMR spectrum of **CBMAA-2** in D<sub>2</sub>O at 300 K, 400 MHz for <sup>1</sup>H-NMR and 101 MHz for <sup>13</sup>C-NMR. ✧ residual H<sub>2</sub>O, ◇ residual acetone.

## ADDITIONAL XPS SPECTRA

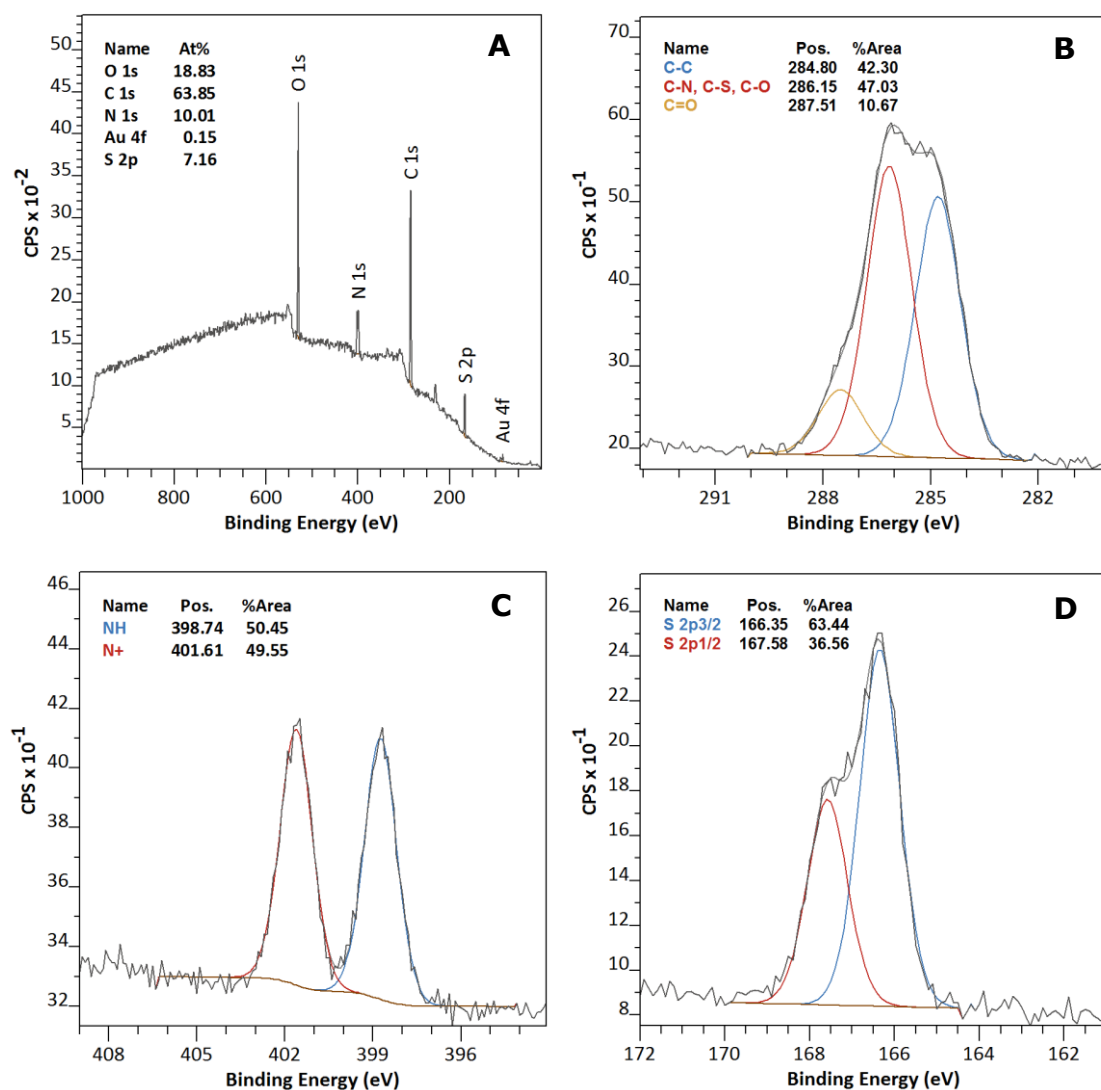

**Figure S13.** XPS spectra of gold surfaces coated with **SBMAA-2** polymer brushes grown via SI-ATRP: (A) wide scan spectrum, (B) C 1s narrow scan spectrum, (C) N 1s narrow scan spectrum and (D) S 2p narrow scan spectrum.

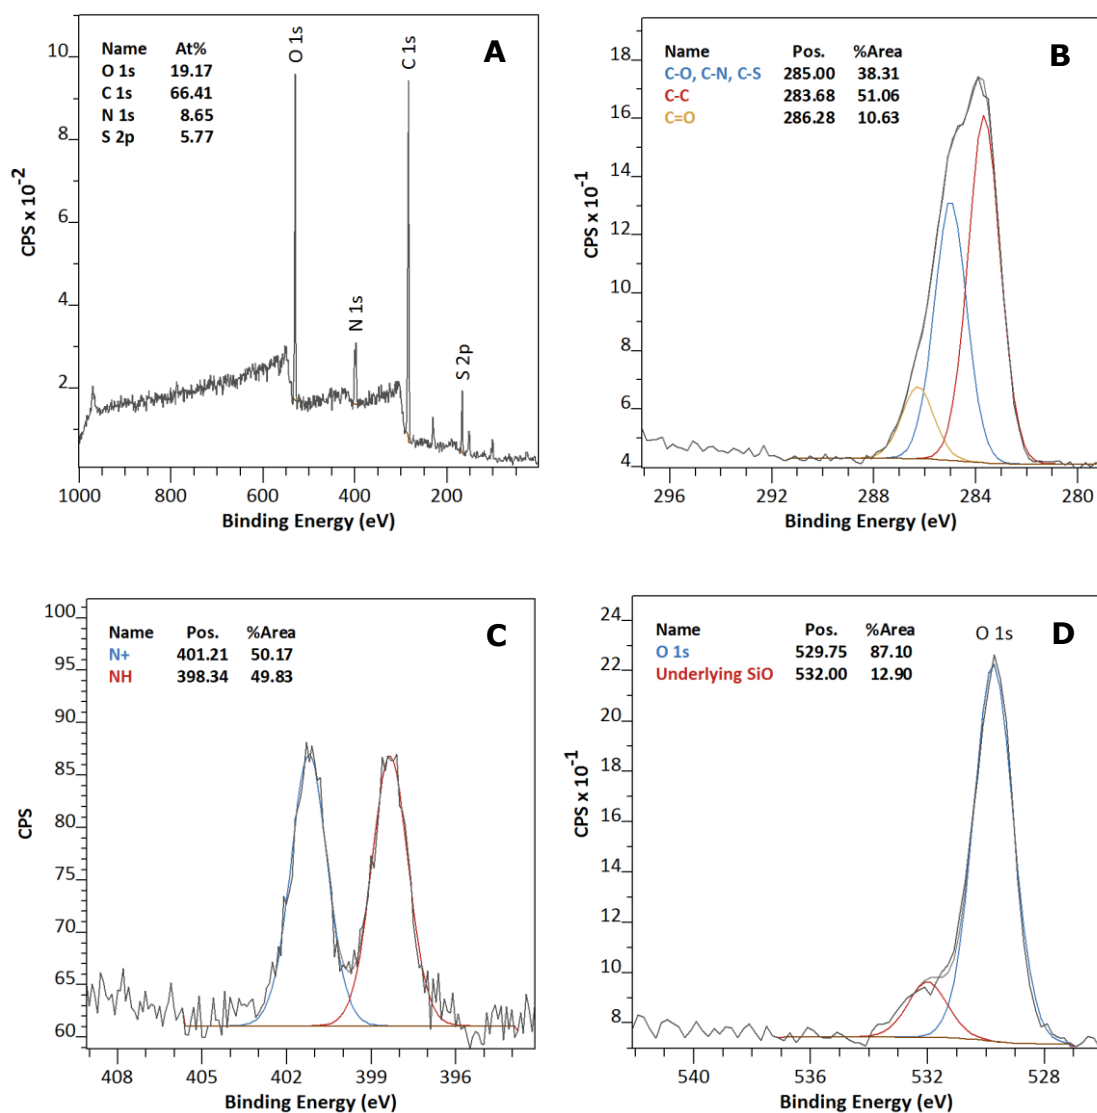

**Figure S14.** XPS spectra of Dynabeads modified with **SBMAA-2** polymer brushes grown via SI-ATRP: (A) wide scan spectrum, (B) C 1s narrow scan spectrum, (C) N 1s narrow scan spectrum and (D) O 1s narrow scan spectrum. **SBMAA-2**-coated Dynabeads were dropcasted on a Si(111) surface to allow for XPS analysis. \*The two extra peaks (to the right of the S 2p peak) in the wide scans and the minor oxygen peak in the oxygen narrow scan spectrum originate from the underlying SiO layer.

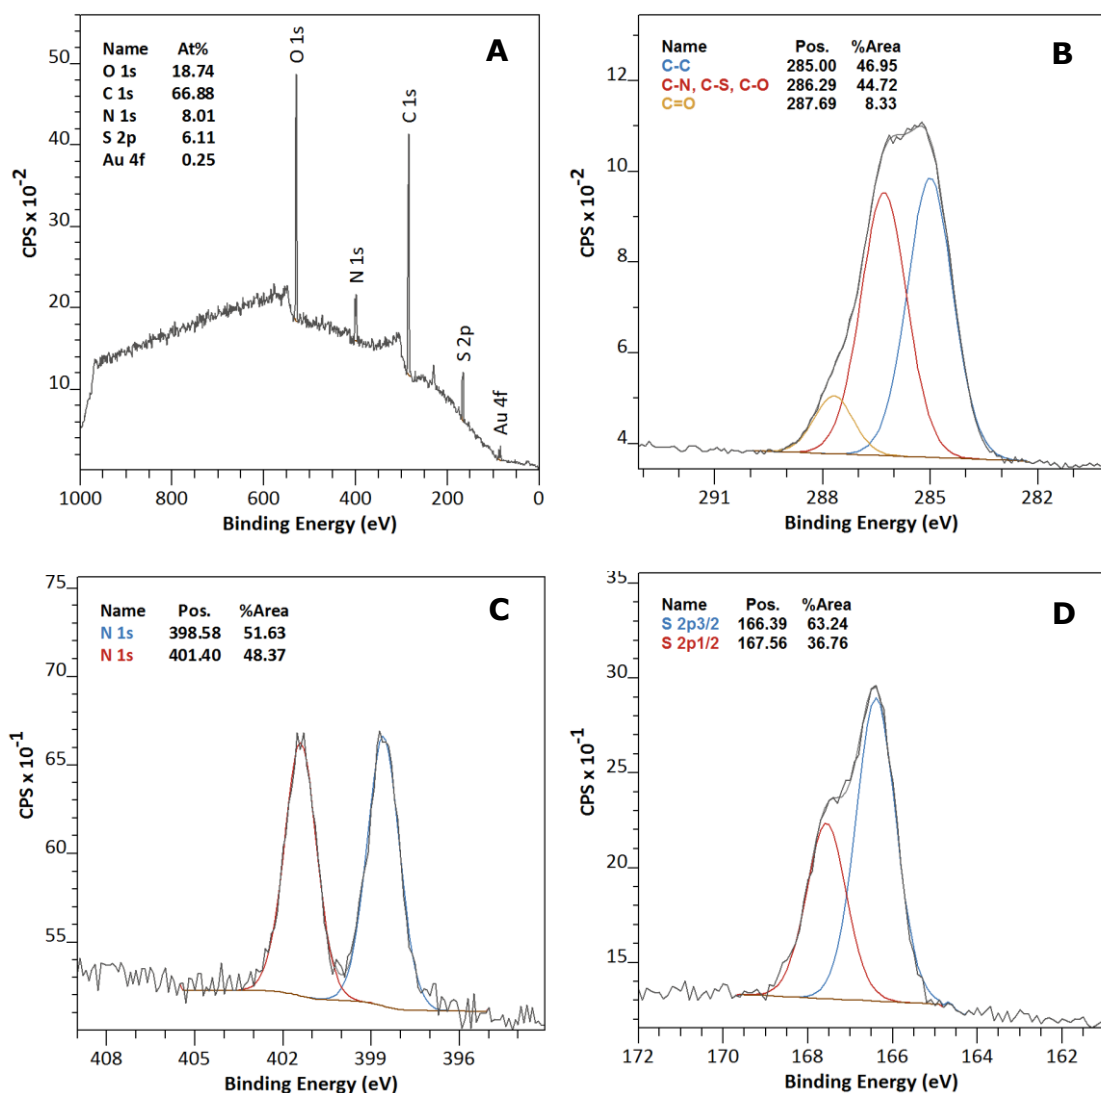

**Figure S15.** XPS spectra of gold surfaces coated with **SBMAA-3** polymer brushes grown via SI-ATRP: (A) wide scan spectrum, (B) C 1s narrow scan spectrum, (C) N 1s narrow scan spectrum and (D) S 2p narrow scan spectrum.

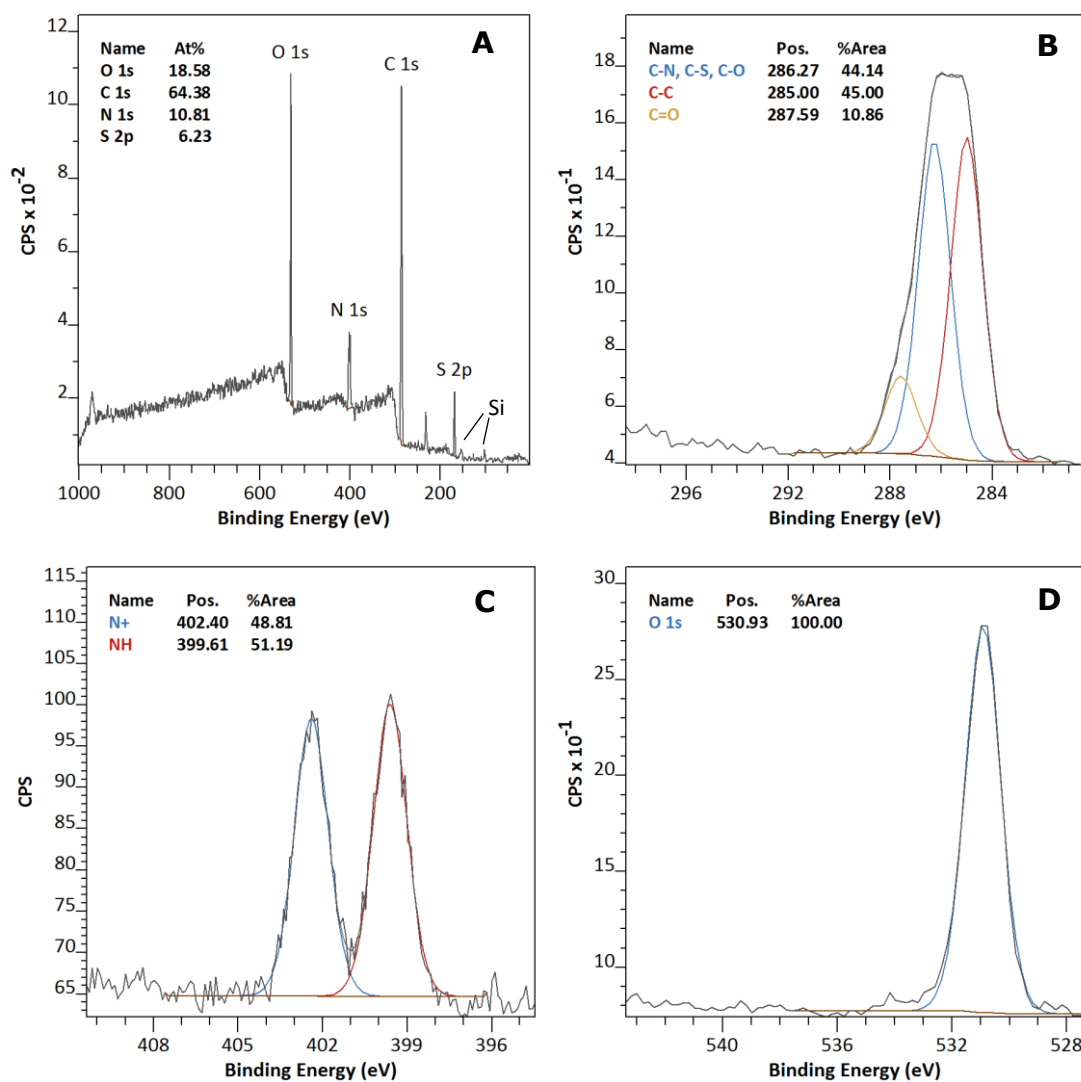

**Figure S16.** XPS spectra of Dynabeads modified with **SBMAA-3** polymer brushes grown via SI-ATRP: (A) wide scan spectrum, (B) C 1s narrow scan spectrum, (C) N 1s narrow scan spectrum and (D) O 1s narrow scan spectrum. **SBMAA-3**-coated Dynabeads were dropcasted on a Si(111) surface to allow for XPS analysis (hence the small Si peaks in the wide scan spectrum).

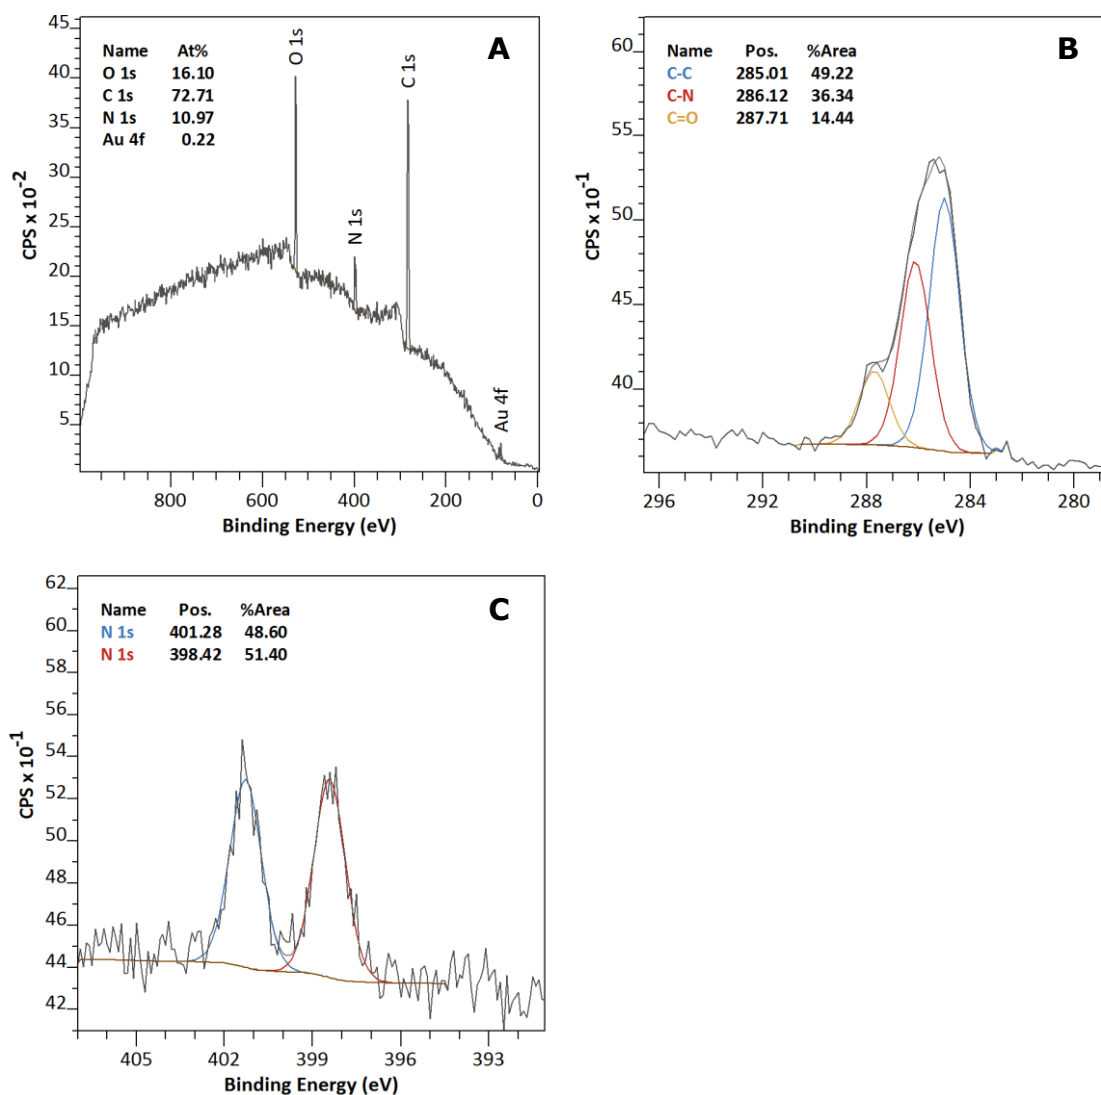

**Figure S17.** XPS spectra of gold surfaces coated with **CBMAA-2** polymer brushes grown via SI-ATRP: (A) wide scan spectrum and (B) N 1s narrow scan spectrum.

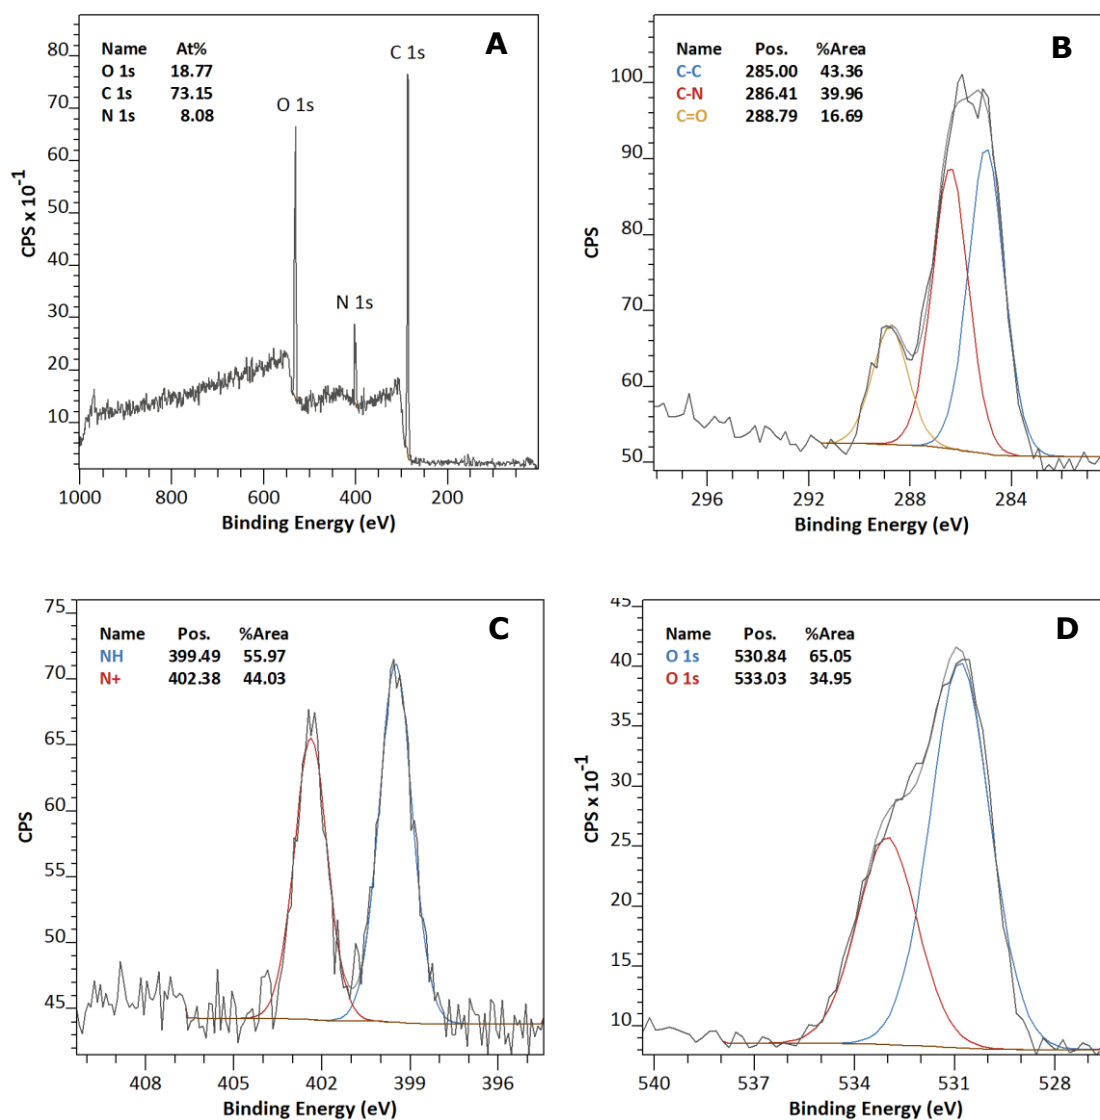

**Figure S18.** XPS spectra of Dynabeads modified with **CBMAA-2** polymer brushes grown via SI-ATRP: (A) wide scan spectrum, (B) C 1s narrow scan spectrum, (C) N 1s narrow scan spectrum and (D) O 1s narrow scan spectrum. **CBMAA-2**-coated Dynabeads were dropcasted on a Si(111) surface to allow for XPS analysis.



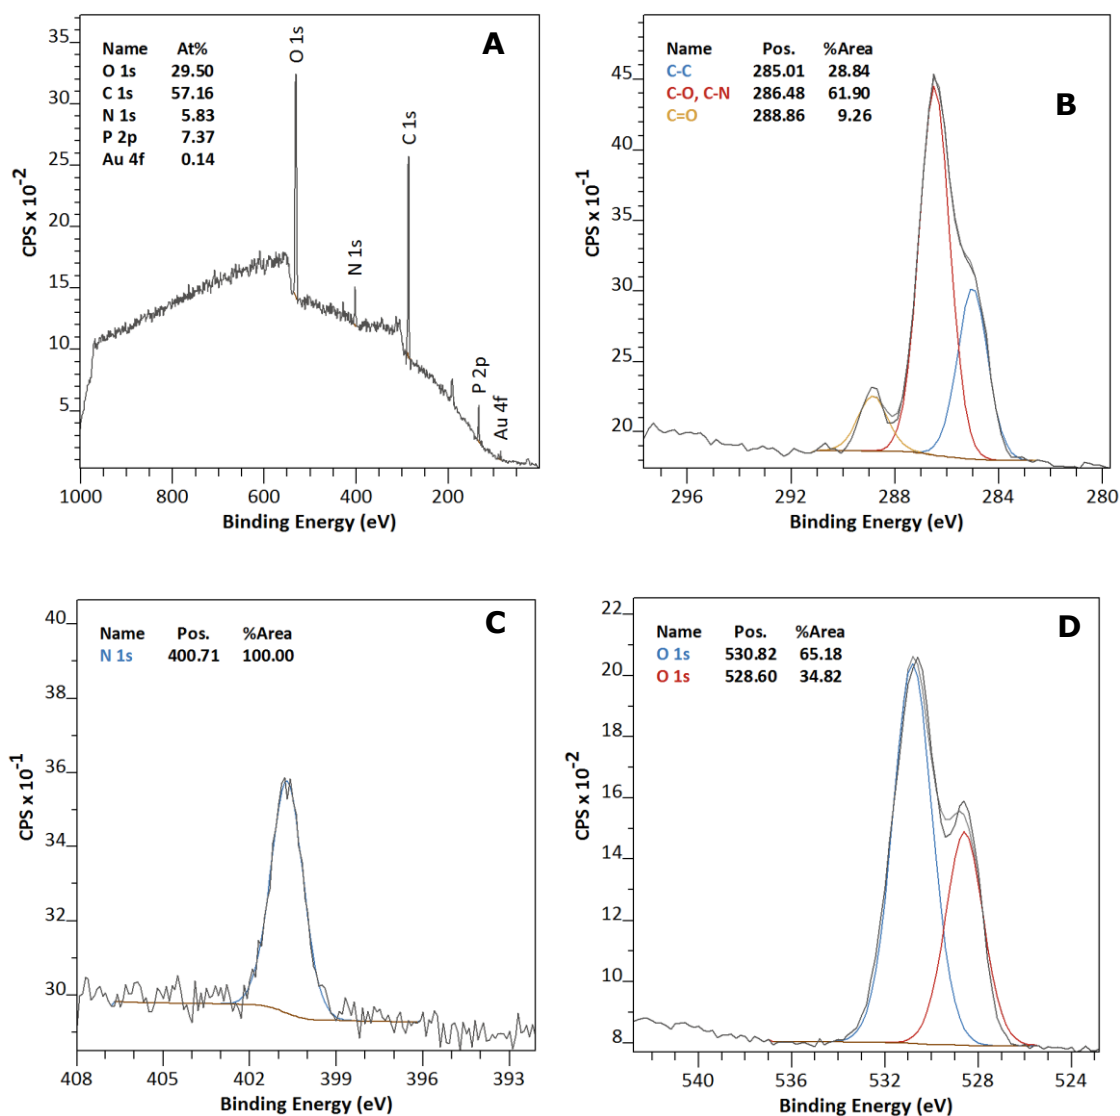

**Figure S19.** XPS spectra of gold surfaces coated with **PCMA-2** polymer brushes grown via SI-ATRP: (A) wide scan spectrum, (B) C 1s narrow scan spectrum, (C) N 1s narrow scan spectrum and (D) O 1s narrow scan spectrum.

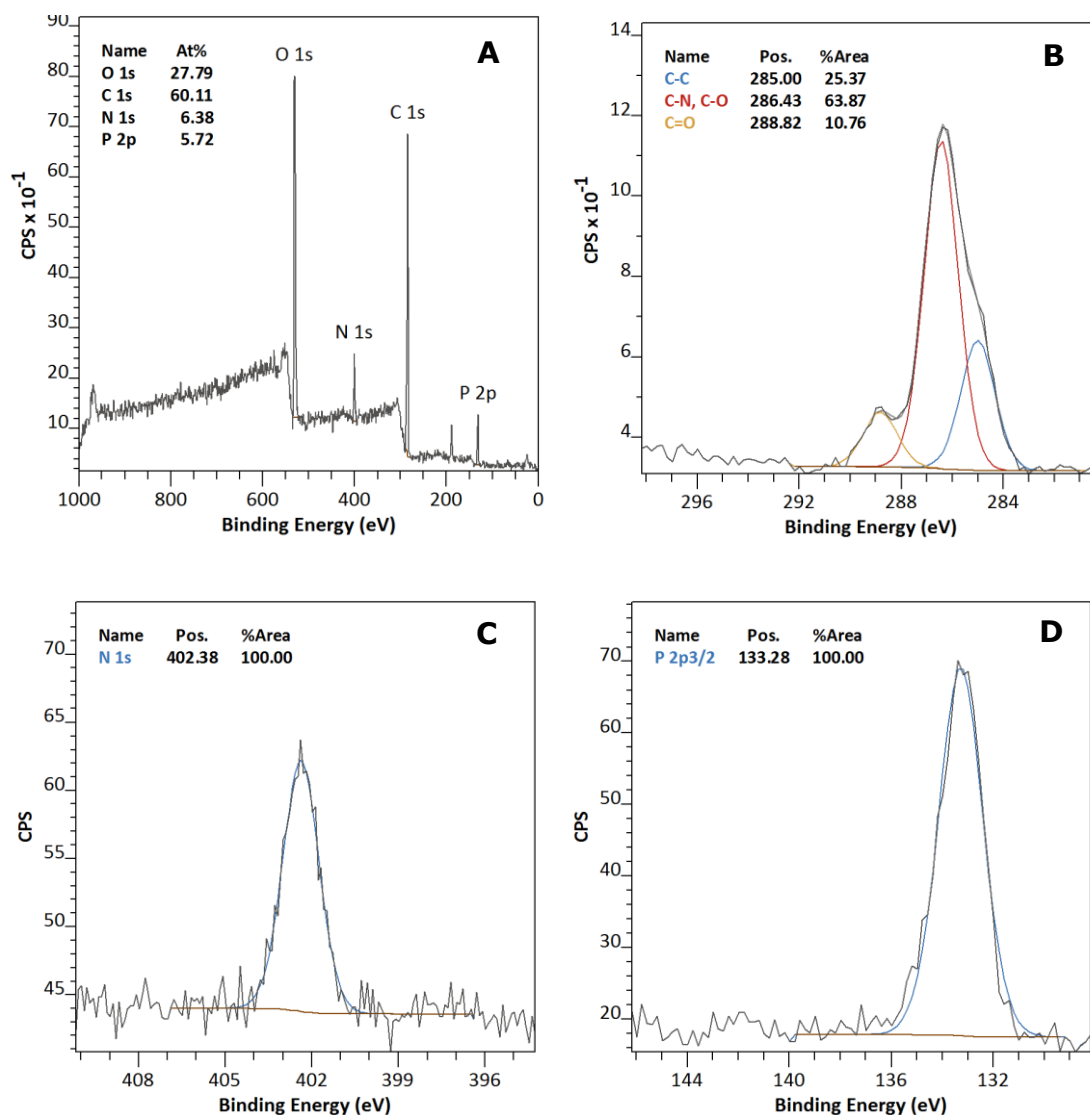

**Figure S20.** XPS spectra of Dynabeads modified with **PCMA-2** polymer brushes grown via SI-ATRP: (A) wide scan spectrum, (B) C 1s narrow scan spectrum, (C) N 1s narrow scan spectrum and (D) P 2p narrow scan spectrum and (E). **PCMA-2**-coated Dynabeads were dropcasted on a Si(111) surface to allow for XPS analysis.

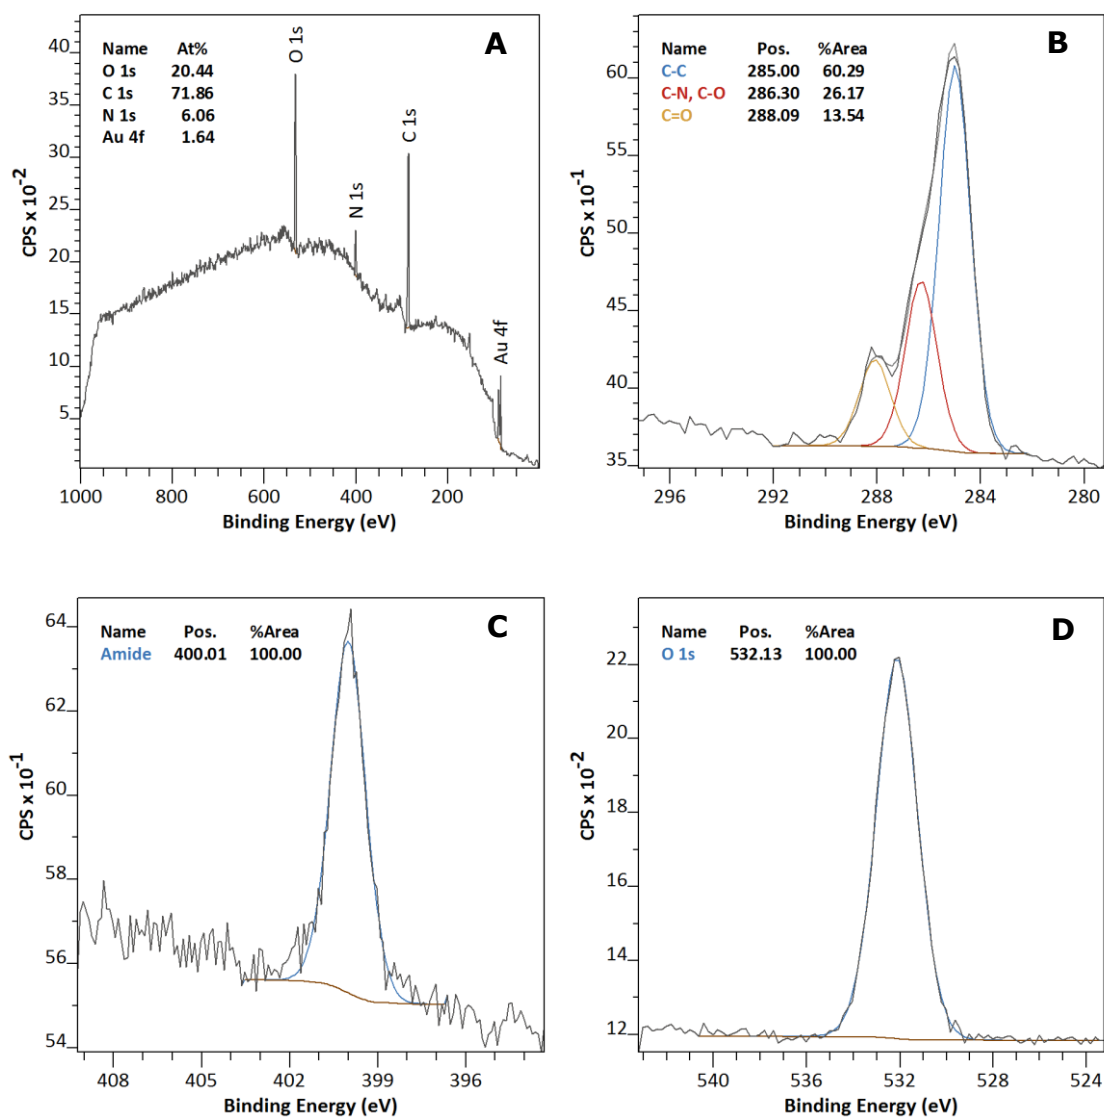

**Figure S21.** XPS spectra of gold surfaces coated with **HPMAA** polymer brushes grown via SI-ATRP: (A) wide scan spectrum, (B) C 1s narrow scan spectrum, (C) N 1s narrow scan spectrum and (D) O 1s narrow scan spectrum.

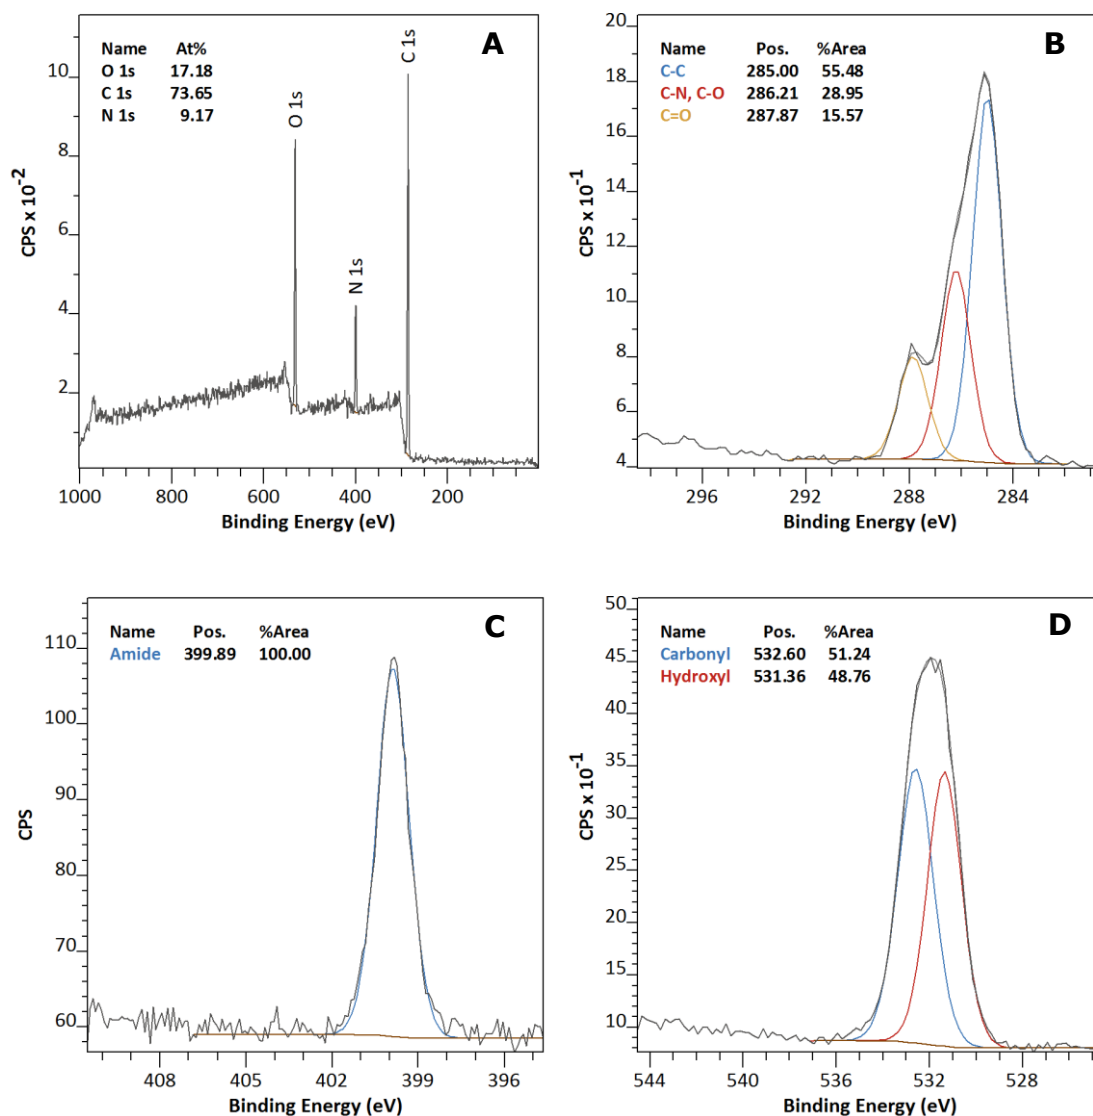

**Figure S22.** XPS spectra of Dynabeads modified with **HPMAA** polymer brushes grown via SI-ATRP: (A) wide scan spectrum, (B) C 1s narrow scan spectrum, (C) N 1s narrow scan spectrum and (D) O 1s narrow scan spectrum. Poly(**HPMAA**)-coated Dynabeads were dropcasted on a Si(111) surface to allow for XPS analysis.

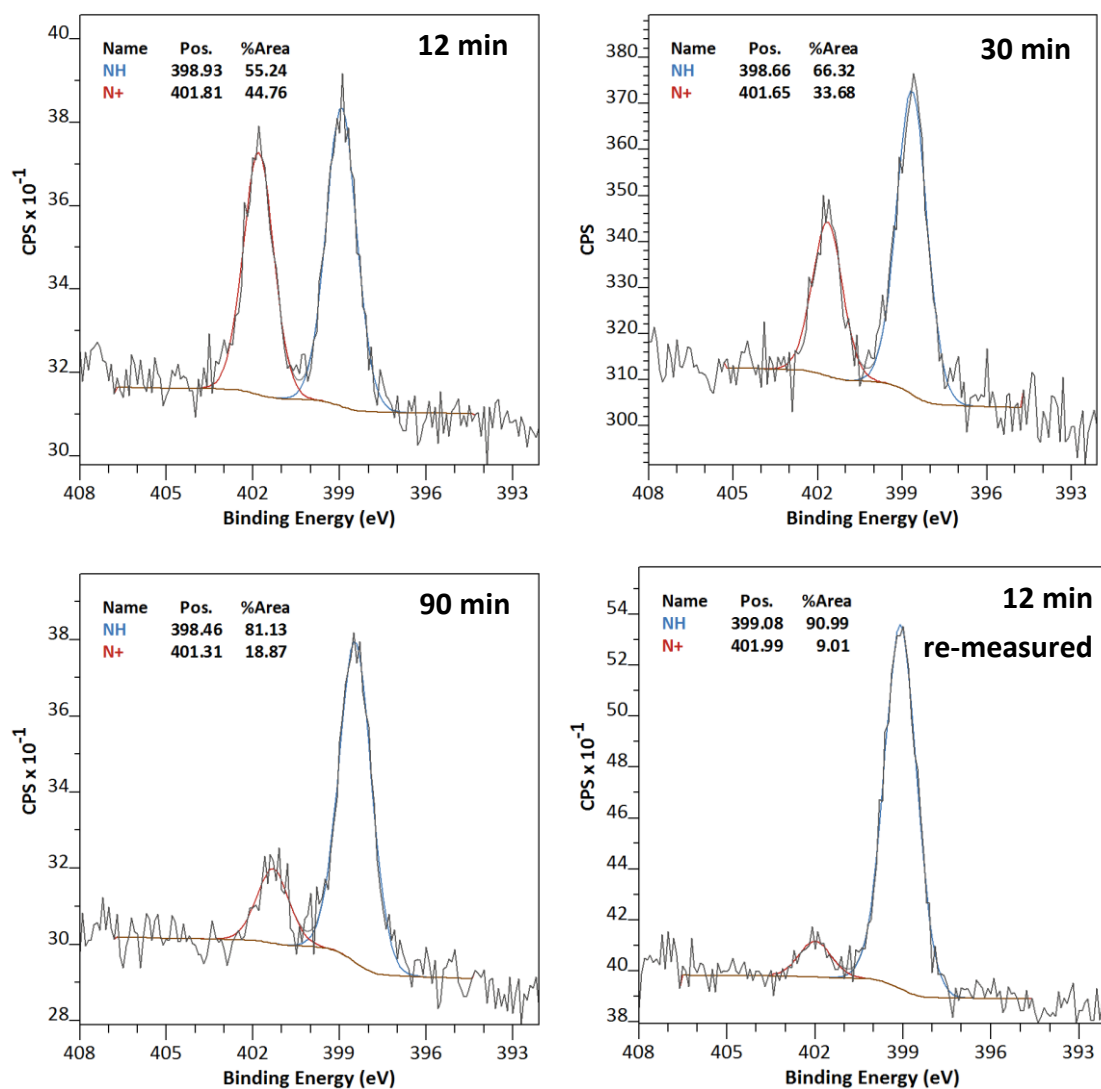

**Figure S23.** XPS N 1s narrow scan spectra of poly(CBMAA-2)-coated gold surfaces grown via SI-ATRP for 12, 30 and 90 min. The surfaces were placed together inside the XPS chamber and measured sequentially in the order of 12, 30 and 90 min ATRP. Without having taken the samples out of the XPS, the 12 min gold surface was measured again. These data revealed that the time within the XPS chamber determines the relative heights of the N 1s peaks.

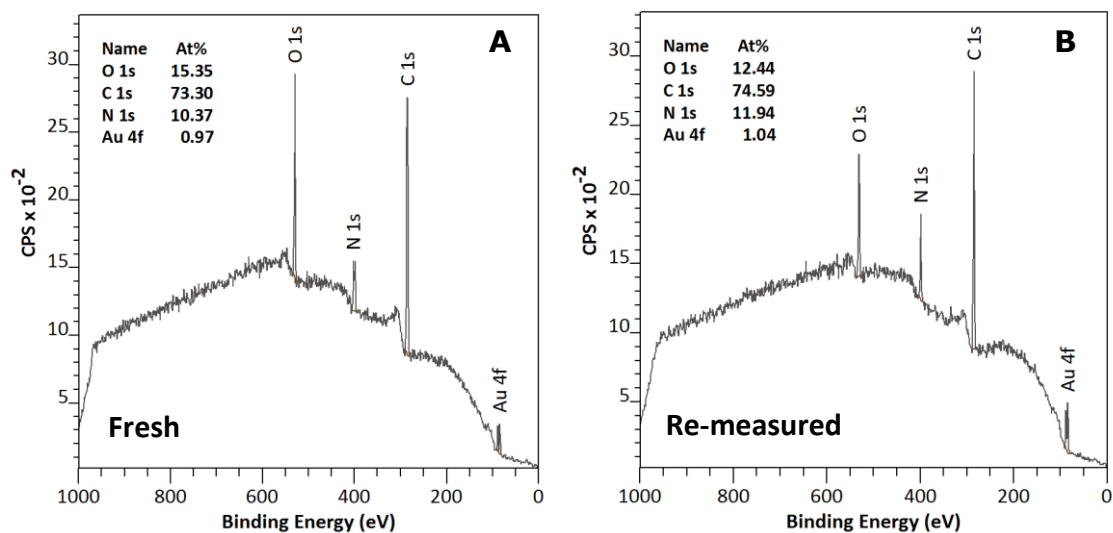

**Figure S24.** XPS wide scan spectra of a poly(CBMAA-2)-coated gold surface prepared by 12 min SI-ATRP: either measured directly (A) or after approximately 12 hours (B) without having taken the sample out of the XPS.

## ZETA POTENTIAL MEASUREMENTS

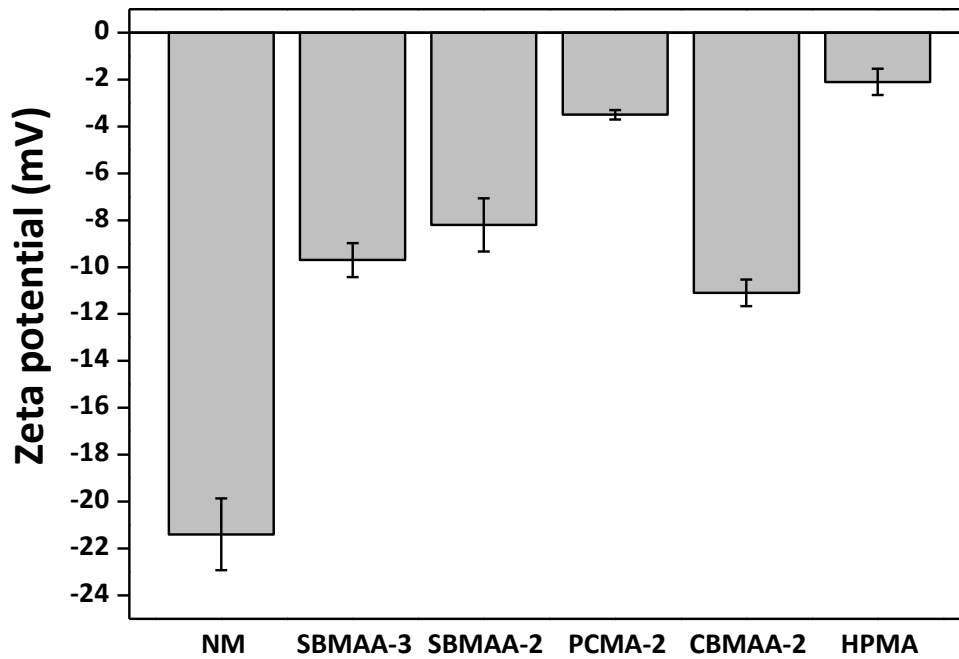

**Figure S25.** Zeta potentials of non-modified (NM) and polymer-coated Dynabeads, measured in PBS pH 7.4 at 25 °C. Presented data are averages of two independent measurements, standard deviations are presented as error bars. \*NM beads showed positive zeta potentials in milliQ ( $30.6 \pm 0.7$ ) whereas all polymer-coated beads were negative in milliQ.

ADDITIONAL FLOW CYTOMETRY DATA

**Table S1.** Median fluorescence data (FITC-channel) obtained for non-modified and polymer-coated beads incubated in PBS or BSA-AF488 (0.5 mg/mL in PBS). PBS values are subtracted from BSA values to obtain the corrected values. The listed averages and standard deviations are used for Figure 4.

| <i>Sample</i>       | <i>PBS</i> | <i>BSA</i> | <i>Corrected value</i> | <i>Average</i> | <i>Standard deviation</i> |
|---------------------|------------|------------|------------------------|----------------|---------------------------|
| <i>Non-modified</i> | 208        | 2409       | 2201                   |                |                           |
|                     | 163        | 1967       | 1804                   |                |                           |
|                     | 160        | 2782       | 2622                   | 2209.0         | 409.1                     |
| <i>SBMAA-3</i>      | 312        | 321        | 9                      |                |                           |
|                     | 253        | 258        | 5                      | 7.0            | 2.8                       |
| <i>SBMAA-2</i>      | 318        | 336        | 18                     |                |                           |
|                     | 256        | 273        | 17                     | 17.5           | 0.7                       |
| <i>CBMAA-2</i>      | 210        | 221        | 11                     |                |                           |
|                     | 229        | 246        | 17                     | 14.0           | 4.2                       |
| <i>PCMA-2</i>       | 310        | 311        | 1                      |                |                           |
|                     | 244        | 257        | 13                     | 7.0            | 8.5                       |
| <i>HPMAA</i>        | 311        | 318        | 7                      |                |                           |
|                     | 253        | 261        | 8                      | 7.5            | 0.7                       |



**Table S2.** Median fluorescence data (PE-channel) obtained for non-modified and polymer-coated beads incubated in PBS or biotinylated serum (~6 mg/mL) followed by Strep-PE. PBS values are subtracted from values for serum to obtain the corrected values. The listed averages and standard deviations are used for Figure 4.

| <i>Sample</i>       | <i>PBS</i> | <i>Serum</i> | <i>Corrected value</i> | <i>Average</i> | <i>Standard deviation</i> |
|---------------------|------------|--------------|------------------------|----------------|---------------------------|
| <i>Non-modified</i> | 95.7       | 8980         | 8884.3                 |                |                           |
|                     | 97.5       | 9915         | 9817.5                 |                |                           |
|                     | 95.1       | 8430         | 8334.9                 | 9012.2         | 749.5                     |
| <i>SBMAA-3</i>      | 121        | 644          | 523                    |                |                           |
|                     | 135        | 655          | 520                    | 521.5          | 2.1                       |
| <i>SBMAA-2</i>      | 130        | 344          | 214                    |                |                           |
|                     | 121        | 266          | 145                    |                |                           |
|                     | 135        | 332          | 197                    | 185.3          | 35.9                      |
| <i>CBMAA-2</i>      | 115        | 142          | 27                     |                |                           |
|                     | 121        | 205          | 84                     | 55.5           | 40.3                      |
| <i>PCMA-2</i>       | 129        | 171          | 42                     |                |                           |
|                     | 121        | 185          | 64                     |                |                           |
|                     | 133        | 226          | 93                     | 66.3           | 25.6                      |
| <i>HPMAA</i>        | 129        | 155          | 26                     |                |                           |
|                     | 121        | 154          | 33                     |                |                           |
|                     | 134        | 181          | 47                     | 35.3           | 10.7                      |

## SPR EXPERIMENTS

During our SPR experiments using sulfobetaine-coated surfaces, we observed a negative dip in the relative response units just after sample injection. The signal only stabilized after an extended time of flushing with running buffer. The dip was attributed to by the difference in salt concentration between running buffer and sample. This is supported by a similar dip that was observed when we injected buffer with an increased salt concentration (see Fig. S23). No dip was observed when a sucrose solution was with equal salt concentration between sample and running buffer. The dip is probably caused by a sudden swelling of the brushes caused by a difference in salt concentration between serum and the running buffer. Sulfobetaine-based materials swell considerably with increased ionic strength<sup>2, 3</sup> and as the refractive index lowers upon swelling,<sup>4</sup> a decrease in signal can be observed. To avoid salt effects, 100% bovine serum (pooled from 3 adult cows) was dialyzed against the running buffer. The serum dilutions were prepared from the dialyzed serum solution. Long injection times and low flow rates were needed in order to get enough fouling to be able to discriminate **SBMAA-3** from **SBMAA-2**.

## REFERENCES

- S1. Chen, L.; Honma, Y.; Mizutani, T.; Liaw, D. J.; Gong, J. P.; Osada, Y. Effects of polyelectrolyte complexation on the UCST of zwitterionic polymer. *Polymer* **2000**, *41* (1), 141-147.
- S2. Higaki, Y.; Inutsuka, Y.; Sakamaki, T.; Terayama, Y.; Takenaka, A.; Higaki, K.; Yamada, N. L.; Moriwaki, T.; Ikemoto, Y.; Takahara, A. Effect of Charged Group Spacer Length on Hydration State in Zwitterionic Poly(sulfobetaine) Brushes. *Langmuir* **2017**, *33* (34), 8404-8412.
- S3. Wang, T.; Kou, R.; Liu, H.; Liu, L.; Zhang, G.; Liu, G. Anion Specificity of Polyzwitterionic Brushes with Different Carbon Spacer Lengths and Its Application for Controlling Protein Adsorption. *Langmuir* **2016**, *32* (11), 2698-2707.
- S4. Tang, Y.; Lu, J. R.; Lewis, A. L.; Vick, T. A.; Stratford, P. W. Swelling of zwitterionic polymer films characterized by spectroscopic ellipsometry. *Macromolecules* **2001**, *34* (25), 8768-8776.
